# Supplementary material for: Association of Germline Variation in Driver Genes with Breast Cancer Risk in Chilean Population
Source: MDPI journal article supplement (doi:10.3390/ijms242216076), 2023-11-08
Supplement: s1 [file s1]

Supplementary Table 2. Genotype and allelic frequencies of rs75704921 (*ARID2*), rs2229032 (*ATR*), rs3735156 (*KMT2C*), rs2276738 (*MAP3K13*), rs2293906 (*MAP3K13*), rs4075943 (*MAP3K13*), rs13091808 (*MAP3K13*), rs178831 (*NCOR1*), and rs3759173 (*TBX3*) according the number of BC cases in the families in *BRCA1/2*-negative breast cancer cases and controls.

| Genotype or allele           | Controls (%)<br>(n=1258) | Families with 2 BC and/or OC cases (n=165) |                  |                      | Families with ≥ 3 BC and/or OC cases (n=151) |                  |                      |
|------------------------------|--------------------------|--------------------------------------------|------------------|----------------------|----------------------------------------------|------------------|----------------------|
|                              |                          | BC cases (%)                               | OR [95% CI]      | P value <sup>a</sup> | BC cases (%)                                 | OR [95% CI]      | P value <sup>a</sup> |
| rs75704921 ( <i>ARID2</i> )  |                          |                                            |                  |                      |                                              |                  |                      |
| C/C                          | 1235 (96.1)              | 156 (94.8)                                 | 1.0 (ref)        | -                    | 143 (94.9)                                   | 1.0 (ref)        | -                    |
| C/T                          | 48 (3.7)                 | 9 (5.2)                                    | 1.0 [0.7-1.4]    | 0.92                 | 8 (5.1)                                      | 1.0 [0.7-1.5]    | 0.76                 |
| T/T                          | 2 (0.2)                  | 0 (0.0)                                    | 0.7 [0.4-1.1]    | 0.21                 | 0 (0.0)                                      | 0.7 [0.4-1.3]    | 0.43                 |
| C/T+T/T                      | 50 (3.9)                 | 9 (5.2)                                    | 0.9 [0.6-1.3]    | 0.72                 | 8 (5.1)                                      | 0.9 [0.6-1.4]    | 1.00                 |
| Allele C                     | 2518 (98.0)              | 21 (97.4)                                  | 1.0 (ref)        | -                    | 294 (97.5)                                   | 1.0 (ref)        | -                    |
| Allele T                     | 52 (2.0)                 | 9 (2.6)                                    | 0.8 [0.6-1.1]    | 0.29                 | 8 (2.5)                                      | 0.9 [0.7-1.1]    | 0.36                 |
| rs2229032 ( <i>ATR</i> )     |                          |                                            |                  |                      |                                              |                  |                      |
| C/C                          | 1010 (78.6)              | 124 (74.8)                                 | 1.0 (ref)        | -                    | 122 (80.4)                                   | 1.0 (ref)        | -                    |
| C/T                          | 261 (20.3)               | 39 (23.9)                                  | 1.2 [0.8-1.8]    | 0.29                 | 27 (18.2)                                    | 0.8 [0.5-1.3]    | 0.65                 |
| T/T                          | 14 (1.1)                 | 2 (1.3)                                    | 1.2 [0.2-4.8]    | 0.67                 | 2 (1.4)                                      | 1.3 [0.2-5.0]    | 0.66                 |
| C/T+T/T                      | 275 (21.4)               | 41 (25.2)                                  | 1.2 [0.8-1.8]    | 0.30                 | 28 (19.6)                                    | 0.8 [0.5-1.3]    | 0.66                 |
| Allele C                     | 2281 (88.8)              | 287 (86.8)                                 | 1.0 (ref)        | -                    | 271 (89.5)                                   | 1.0 (ref)        | -                    |
| Allele T                     | 289 (11.2)               | 43 (13.2)                                  | 1.2 [0.8-1.7]    | 0.30                 | 31 (10.5)                                    | 0.9 [0.6-1.3]    | 0.76                 |
| rs3735156 ( <i>KMT2C</i> )   |                          |                                            |                  |                      |                                              |                  |                      |
| C/C                          | 1277 (99.4)              | 164 (99.4)                                 | 1.0 (ref)        | -                    | 150 (99.3)                                   | 1.0 (ref)        | -                    |
| C/G                          | 8 (0.6)                  | 1 (0.6)                                    | 1.01 [0.09-6.59] | 1                    | 1 (0.7)                                      | 1.13 [0.10-7.37] | 0.610                |
| G/G                          | 0 (0.0)                  | 0 (0)                                      | -                | -                    | 0 (0)                                        | -                | -                    |
| C/G+G/G                      | 8 (0.6)                  | 1 (0.6)                                    | 1.01 [0.09-6.59] | 1                    | 1 (0.7)                                      | 1.13 [0.10-7.37] | 0.610                |
| Allele C                     | 2532 (99.7)              | 329 (99.7)                                 | 1.0 (ref)        | -                    | 301 (99.6)                                   | 1.0 (ref)        | -                    |
| Allele G                     | 8 (0.3)                  | 1 (0.3)                                    | 1.01 [0.09-6.53] | 1                    | 1 (0.4)                                      | 1.13 [0.10-7.29] | 0.609                |
| rs2276738 ( <i>MAP3K13</i> ) |                          |                                            |                  |                      |                                              |                  |                      |
| G/G                          | 432 (33.6)               | 52 (31.4)                                  | 1.0 (ref)        | -                    | 40 (26.4)                                    | 1.0 (ref)        | -                    |
| G/C                          | 612 (47.6)               | 75 (45.5)                                  | 1.0 [0.6-1.4]    | 1.00                 | 82 (54.3)                                    | 1.4 [0.9-2.1]    | 0.12                 |
| C/C                          | 241 (18.8)               | 38 (23.1)                                  | 1.3 [0.8-2.0]    | 0.24                 | 29 (19.3)                                    | 1.2 [0.7-2.1]    | 0.34                 |
| G/C+C/C                      | 1044 (66.4)              | 113 (68.6)                                 | 0.8 [0.6-1.2]    | 0.58                 | 111 (73.6)                                   | 1.3 [0.9-2.0]    | 0.10                 |
| Allele G                     | 1476 (57.4)              | 179 (54.2)                                 | 1.0 (ref)        | -                    | 162 (53.6)                                   | 1.0 (ref)        | -                    |
| Allele C                     | 1094 (42.6)              | 151 (45.8)                                 | 1.1 [0.8-1.4]    | 0.32                 | 140 (46.4)                                   | 1.1 [0.9-1.4]    | 0.26                 |
| rs2293906 ( <i>MAP3K13</i> ) |                          |                                            |                  |                      |                                              |                  |                      |

|                      |             |            |               |      |            |                |      |
|----------------------|-------------|------------|---------------|------|------------|----------------|------|
| C/C                  | 420 (32.7)  | 56 (34.2)  | 1.0 (ref)     | -    | 50 (32.9)  | 1.0 (ref)      | -    |
| C/T                  | 617 (48.0)  | 85 (51.6)  | 1.0 [0.7-1.4] | 0.92 | 78 (51.7)  | 1.0 [0.7-1.5]  | 0.76 |
| T/T                  | 248 (19.3)  | 24 (14.3)  | 0.7 [0.4-1.1] | 0.21 | 23 (15.4)  | 0.7 [0.4-1.3]  | 0.43 |
| C/T+T/T              | 865 (67.3)  | 109 (65.8) | 0.9 [0.6-1.3] | 0.72 | 101 (67.1) | 0.9 [0.6-1.4]  | 1.00 |
| Allele C             | 1457 (56.7) | 197 (59.9) | 1.0 (ref)     | -    | 178 (58.7) | 1.0 (ref)      | -    |
| Allele T             | 1113 (35.7) | 133 (40.1) | 0.8 [0.6-1.1] | 0.29 | 124 (41.3) | 0.9 [0.7-1.1]  | 0.36 |
| rs4075943 (MAP3K13)  |             |            |               |      |            |                |      |
| T/T                  | 841 (65.4)  | 103 (62.6) | 1.0 (ref)     | -    | 109 (72.3) | 1.0 (ref)      | -    |
| T/A                  | 402 (31.3)  | 56 (33.7)  | 1.1 [0.7-1.6] | 0.52 | 38 (25.0)  | 0.7 [0.4-1.0]  | 0.10 |
| A/A                  | 42 (3.3)    | 6 (3.7)    | 1.1 [0.4-2.8] | 0.63 | 4 (2.7)    | 0.7 [0.2-2.1]  | 0.81 |
| T/A+A/A              | 444 (34.6)  | 62 (37.4)  | 1.1 [0.8-1.5] | 0.48 | 42 (27.7)  | 0.7 [0.5-1.0]  | 0.10 |
| Allele T             | 2084 (81.1) | 262 (79.4) | 1.0 (ref)     | -    | 256 (84.8) | 1.0 (ref)      | -    |
| Allele A             | 486 (18.9)  | 68 (20.6)  | 1.1 [0.8-1.4] | 0.53 | 46 (15.2)  | 0.7 [0.5-1.0]  | 0.13 |
| rs13091808 (MAP3K13) |             |            |               |      |            |                |      |
| C/C                  | 956 (74.4)  | 125 (75.8) | 1.0 (ref)     | -    | 112 (74.1) | 1.0 (ref)      | -    |
| C/T                  | 297 (23.1)  | 37 (22.2)  | 0.9 [0.6-1.4] | 0.83 | 36 (23.7)  | 1.0 [0.6-1.5]  | 0.91 |
| T/T                  | 32 (2.5)    | 3 (2.0)    | 0.7 [0.2-2.6] | 1.00 | 3 (2.2)    | 0.8 [0.2-2.9]  | 1.00 |
| C/T+T/T              | 329 (25.6)  | 40 (24.2)  | 0.9 [0.6-1.3] | 0.76 | 39 (25.9)  | 1.0 [0.6-1.5]  | 0.91 |
| Allele C             | 2209 (86.0) | 287 (86.9) | 1.0 (ref)     | -    | 260 (86.0) | 1.0 (ref)      | -    |
| Allele T             | 361 (14.0)  | 43 (13.1)  | 0.9 [0.6-1.3] | 0.71 | 42 (14.0)  | 1.0 [0.7-1.4]  | 0.93 |
| rs178831 (NCOR1)     |             |            |               |      |            |                |      |
| G/G                  | 452 (35.2)  | 69 (41.8)  | 1.0 (ref)     | -    | 60 (40)    | 1.0 (ref)      | -    |
| G/A                  | 624 (48.5)  | 74 (44.9)  | 0.7 (0.5-1.1) | 0.19 | 67 (44.3)  | 0.8 (0.5-1.1)  | 0.28 |
| A/A                  | 209 (16.3)  | 22 (13.3)  | 0.6 (0.4-1.1) | 0.17 | 24 (15.7)  | 0.8 (0.5-1.4)  | 0.60 |
| G/A+A/A              | 833 (64.8)  | 96 (58.2)  | 0.7 (0.5-1.0) | 0.11 | 91 (60.0)  | 0.8 (0.5-1.1)  | 0.26 |
| Allele G             | 1528 (59.5) | 212 (64.2) | 1.0 (ref)     | -    | 187 (62.1) | 1.0 (ref)      | -    |
| Allele A             | 1042 (40.5) | 118 (35.8) | 0.8 (0.6-1.0) | 0.11 | 115 (37.9) | 0.8 (0.6-1.1)  | 0.40 |
| rs3759173 (TBX3)     |             |            |               |      |            |                |      |
| C/C                  | 1077 (83.8) | 139 (84.3) | 1.0 (ref)     | -    | 121 (80.4) | 1.0 (ref)      | -    |
| C/A                  | 199 (15.5)  | 24 (14.5)  | 0.9 [0.5-1.4] | 0.81 | 30 (19.6)  | 1.3 [0.8-2.0]  | 0.23 |
| A/A                  | 9 (0.7)     | 2 (1.2)    | 1.7 [0.3-7.9] | 0.37 | 0 (0.0)    | 0.4 [0.02-8.1] | 1.00 |
| C/A+A/A              | 208 (16.2)  | 26 (15.7)  | 0.9 [0.6-1.4] | 0.91 | 30 (19.6)  | 1.2 [0.8-1.9]  | 0.29 |
| Allele C             | 2353 (91.6) | 302 (91.5) | 1.0 (ref)     | -    | 272 (90.1) | 1.0 (ref)      | -    |
| Allele A             | 217 (8.4)   | 28 (8.5)   | 0.9 [0.6-1.5] | 0.92 | 30 (9.9)   | 1.1 [0.7-1.7]  | 0.50 |

BC breast cancer, OC ovarian cancer, OR odds ratio, CI confidence interval, ref: Reference; <sup>a</sup> Fisher's exact test.
