# Supplementary material for: Association of Germline Variation in Driver Genes with Breast Cancer Risk in Chilean Population
Source: MDPI journal article supplement (doi:10.3390/ijms242216076), 2023-11-08
Supplement: s1 [file s1]

**Supplementary Table 1. Genotype and allelic frequencies of rs75704921 (*ARID2*), rs2229032 (*ATR*), rs3735156 (*KMT2C*), rs2276738 (*MAP3K13*), rs2293906 (*MAP3K13*), rs4075943 (*MAP3K13*), rs13091808 (*MAP3K13*), rs178831 (*NCOR1*), and rs3759173 (*TBX3*) in *BRCA1/2*-negative breast cancer cases and controls.**

| Genotype or allele           | Controls (%)<br>(n=1285) | All BC cases (n=492) |                 |                      | Families with ≥2 BC and/or OC cases (n=316) |                 |                      | Families with a single case, diagnosis at ≤50 years of age (n=176) |                 |                      |
|------------------------------|--------------------------|----------------------|-----------------|----------------------|---------------------------------------------|-----------------|----------------------|--------------------------------------------------------------------|-----------------|----------------------|
|                              |                          | BC cases (%)         | OR [95% CI]     | p-value <sup>a</sup> | BC cases (%)                                | OR [95% CI]     | p-value <sup>a</sup> | BC cases (%)                                                       | OR [95% CI]     | p-value <sup>a</sup> |
| rs75704921 ( <i>ARID2</i> )  |                          |                      |                 |                      |                                             |                 |                      |                                                                    |                 |                      |
| C/C                          | 1235 (96.1)              | 469 (95.4)           | 1.0 (ref)       | -                    | 300 (94.9)                                  | 1.0 (ref)       | -                    | 170 (96.4)                                                         | 1.0 (ref)       | -                    |
| C/T                          | 48 (3.7)                 | 23 (4.6)             | 1.2 [0.7-2.0]   | 0.48                 | 16 (5.1)                                    | 1.3 [0.7-2.5]   | 0.32                 | 6 (3.6)                                                            | 0.9 [0.4-2.2]   | 1.00                 |
| T/T                          | 2 (0.2)                  | 0 (0.0)              | 0.5 [0.02-11.4] | 1.00                 | 0 (0.0)                                     | 0.8 [0.04-18.0] | 1.00                 | 0 (0.0)                                                            | 1.4 [0.07-31.3] | 1.00                 |
| C/T+T/T                      | 50 (3.9)                 | 23 (4.6)             | 1.1 [0.6-1.9]   | 0.58                 | 16 (5.1)                                    | 1.3 [0.7-2.3]   | 0.33                 | 6 (3.6)                                                            | 0.9 [0.3-2.1]   | 1.00                 |
| Allele C                     | 2518 (98.0)              | 961 (97.7)           | 1.0 (ref)       | -                    | 616 (97.4)                                  | 1.0 (ref)       | -                    | 346 (98.2)                                                         | 1.0 (ref)       | -                    |
| Allele T                     | 52 (2.0)                 | 23 (2.3)             | 0.9 [0.7-1.0]   | 0.34                 | 16 (2.6)                                    | 0.8 [0.7-1.0]   | 0.24                 | 6 (1.8)                                                            | 0.9 [0.7-1.2]   | 0.94                 |
| rs2229032 ( <i>ATR</i> )     |                          |                      |                 |                      |                                             |                 |                      |                                                                    |                 |                      |
| C/C                          | 1010 (78.6)              | 382 (77.6)           | 1.0 (ref)       | -                    | 245 (77.5)                                  | 1.0 (ref)       | -                    | 137 (77.8)                                                         | 1.0 (ref)       | -                    |
| C/T                          | 261 (20.3)               | 101 (20.5)           | 1.0 [0.7-1.3]   | 0.89                 | 67 (21.2)                                   | 1.0 [0.7-1.4]   | 0.74                 | 34 (19.3)                                                          | 0.9 [0.6-1.4]   | 0.91                 |
| T/T                          | 14 (1.1)                 | 9 (1.9)              | 1.8 [0.7-4.2]   | 0.22                 | 4 (1.3)                                     | 1.2 [0.4-3.7]   | 0.75                 | 5 (2.8)                                                            | 2.7 [1.0-7.3]   | 0.06                 |
| C/T+T/T                      | 275 (21.4)               | 110 (22.4)           | 1.0 [0.8-1.3]   | 0.64                 | 71 (22.5)                                   | 1.0 [0.7-1.4]   | 0.69                 | 39 (22.2)                                                          | 1.0 [0.7-1.5]   | 0.84                 |
| Allele C                     | 2281 (88.8)              | 865 (87.9)           | 1.0 (ref)       | -                    | 557 (88.1)                                  | 1.0 (ref)       | -                    | 308 (87.5)                                                         | 1.0 (ref)       | -                    |
| Allele T                     | 289 (11.2)               | 119 (12.1)           | 1.0 [0.8-1.3]   | 0.43                 | 75 (11.9)                                   | 1.0 [0.8-1.4]   | 0.61                 | 44 (12.5)                                                          | 1.1 [0.8-1.5]   | 0.47                 |
| rs3735156 ( <i>KMT2C</i> )   |                          |                      |                 |                      |                                             |                 |                      |                                                                    |                 |                      |
| C/C                          | 1277 (99.4)              | 490 (99.6)           | 1.0 (ref)       | -                    | 314 (99.3)                                  | 1.0 (ref)       | -                    | 176 (100)                                                          | 1.0 (ref)       | -                    |
| C/G                          | 8 (0.6)                  | 2 (0.4)              | 0.6 [0.1-2.7]   | 1                    | 2 (0.7)                                     | 1.0 [0.2-4.3]   | 1                    | 0 (0.0)                                                            | -               | -                    |
| G/G                          | 0 (0.0)                  | 0 (0.0)              | -               | -                    | 0 (0.0)                                     | -               | -                    | 0 (0.0)                                                            | -               | -                    |
| C/G+G/G                      | 8 (0.6)                  | 2 (0.4)              | 0.6 [0.14-2.7]  | 1                    | 2 (0.7)                                     | 1.0 [0.2-4.3]   | 1                    | 0 (0.0)                                                            | -               | -                    |
| Allele C                     | 2532 (99.7)              | 982 (99.8)           | 1.0 (ref)       | -                    | 630 (99.7)                                  | 1.0 (ref)       | -                    | 352 (100)                                                          | 1.0 (ref)       | -                    |
| Allele G                     | 8 (0.3)                  | 2 (0.2)              | 0.6 [0.1-2.7]   | 1                    | 2 (0.3)                                     | 1.0 [0.2-4.3]   | 1                    | 0 (0.0)                                                            | -               | -                    |
| rs2276738 ( <i>MAP3K13</i> ) |                          |                      |                 |                      |                                             |                 |                      |                                                                    |                 |                      |
| G/G                          | 432 (33.6)               | 160 (32.5)           | 1.0 (ref)       | -                    | 92 (29.1)                                   | 1.0 (ref)       | -                    | 67 (38.3)                                                          | 1.0 (ref)       | -                    |
| G/C                          | 612 (47.6)               | 225 (45.7)           | 0.9 [0.7-1.2]   | 0.98                 | 157 (49.7)                                  | 1.2 [0.8-1.5]   | 0.26                 | 69 (38.9)                                                          | 0.7 [0.5-1.0]   | 0.09                 |
| C/C                          | 241 (18.8)               | 107 (21.8)           | 1.1 [0.8-1.6]   | 0.23                 | 67 (21.3)                                   | 1.3 [0.9-1.8]   | 0.15                 | 40 (22.8)                                                          | 1.0 [0.6-1.6]   | 0.82                 |
| G/C+C/C                      | 1044 (66.4)              | 332 (67.5)           | 0.8 [0.6-1.0]   | 0.17                 | 224 (70.9)                                  | 1.2 [0.9-1.6]   | 0.16                 | 109 (61.7)                                                         | 0.8 [0.5-1.1]   | 0.22                 |
| Allele G                     | 1476 (57.4)              | 545 (55.4)           | 1.0 (ref)       | -                    | 341 (54.0)                                  | 1.0 (ref)       | -                    | 203 (57.9)                                                         | 1.0 (ref)       | -                    |
| Allele C                     | 1094 (42.6)              | 439 (44.6)           | 1.0 [0.9-1.2]   | 1.0                  | 291 (46.0)                                  | 1.1 [0.9-1.3]   | 0.14                 | 149 (42.1)                                                         | 0.9 [0.7-1.2]   | 0.90                 |
| rs2293906 ( <i>MAP3K13</i> ) |                          |                      |                 |                      |                                             |                 |                      |                                                                    |                 |                      |

|                               |             |            |               |       |            |               |       |            |                |       |
|-------------------------------|-------------|------------|---------------|-------|------------|---------------|-------|------------|----------------|-------|
| C/C                           | 420 (32.7)  | 171 (34.7) | 1.0 (ref)     | -     | 106 (33.6) | 1.0 (ref)     | -     | 65 (36.8)  | 1.0 (ref)      | -     |
| C/T                           | 617 (48.0)  | 234 (47.6) | 0.9 [0.7-1.1] | 0.584 | 163 (51.6) | 1.0 [0.7-1.3] | 0.776 | 71 (40.4)  | 0.7 [0.5-1.0]  | 0.131 |
| T/T                           | 248 (19.3)  | 87 (17.7)  | 0.8 [0.6-1.1] | 0.351 | 47 (14.8)  | 0.7 [0.5-1.0] | 0.152 | 40 (22.8)  | 1.0 [0.6-1.6]  | 0.826 |
| C/T+T/T                       | 865 (67.3)  | 321 (65.3) | 0.9 [0.7-1.1] | 0.422 | 210 (66.4) | 0.9 [0.7-1.2] | 0.785 | 111 (63.2) | 0.8 [0.5-1.1]  | 0.298 |
| Allele C                      | 1457 (56.7) | 576 (58.5) | 1.0 (ref)     | -     | 375 (59.4) | 1.0 (ref)     | -     | 201 (57.0) | 1.0 (ref)      | -     |
| Allele T                      | 1113 (35.7) | 408 (41.5) | 0.9 [0.7-1.0] | 0.345 | 257 (40.6) | 0.8 [0.7-1.0] | 0.245 | 151 (43.0) | 0.9 [0.7-1.2]  | 0.949 |
| rs4075943 ( <i>MAP3K13</i> )  |             |            |               |       |            |               |       |            |                |       |
| T/T                           | 841 (65.4)  | 323 (65.7) | 1.0 (ref)     | -     | 212 (67.2) | 1.0 (ref)     | -     | 111 (63.0) | 1.0 (ref)      | -     |
| T/A                           | 402 (31.3)  | 148 (30.0) | 0.9 [0.7-1.2] | 0.72  | 94 (29.6)  | 0.9 [0.7-1.2] | 0.58  | 54 (30.6)  | 1.0 [0.7-1.4]  | 0.92  |
| A/A                           | 42 (3.3)    | 21 (4.3)   | 1.3 [0.7-2.2] | 0.31  | 10 (3.2)   | 0.9 [0.4-1.9] | 1.00  | 11 (6.4)   | 1.9 [0.9-3.9]  | 0.07  |
| T/A+A/A                       | 444 (34.6)  | 169 (34.3) | 0.9 [0.7-1.2] | 0.95  | 104 (32.8) | 0.9 [0.7-1.2] | 0.59  | 65 (37.0)  | 1.1 [0.7-1.5]  | 0.55  |
| Allele T                      | 2084 (81.1) | 794 (80.7) | 1.0 (ref)     | -     | 518 (82.0) | 1.0 (ref)     | -     | 276 (78.3) | 1.0 (ref)      | -     |
| Allele A                      | 486 (18.9)  | 190 (19.3) | 1.0 [0.8-1.2] | 0.82  | 114 (18.0) | 0.9 [0.7-1.1] | 0.63  | 76 (21.7)  | 1.1 [0.9-1.5]  | 0.25  |
| rs13091808 ( <i>MAP3K13</i> ) |             |            |               |       |            |               |       |            |                |       |
| C/C                           | 956 (74.4)  | 370 (75.2) | 1.0 (ref)     | -     | 237 (75.0) | 1.0 (ref)     | -     | 133 (75.6) | 1.0 (ref)      | -     |
| C/T                           | 297 (23.1)  | 111 (22.6) | 0.9 [0.7-1.2] | 0.84  | 72 (22.9)  | 0.9 [0.7-1.3] | 1.00  | 39 (22.1)  | 0.9 [0.6-1.4]  | 0.84  |
| T/T                           | 32 (2.5)    | 11 (2.2)   | 0.8 [0.4-1.8] | 0.85  | 7 (2.1)    | 0.8 [0.3-2.0] | 1.00  | 4 (2.3)    | 0.9 [0.3-2.8]  | 1.00  |
| C/T+T/T                       | 329 (25.6)  | 122 (24.8) | 0.9 [0.7-1.2] | 0.79  | 79 (25.0)  | 0.9 [0.7-1.3] | 0.88  | 43 (24.4)  | 0.9 [0.6-1.3]  | 0.84  |
| Allele C                      | 2209 (86.0) | 851 (86.5) | 1.0 (ref)     | -     | 546 (86.5) | 1.0 (ref)     | -     | 305 (86.5) | 1.0 (ref)      | -     |
| Allele T                      | 361 (14.0)  | 133 (13.5) | 0.9 [0.7-1.1] | 0.75  | 86 (13.5)  | 0.9 [0.7-1.2] | 0.81  | 47 (13.5)  | 0.9 [0.6-1.3]  | 0.86  |
| rs178831 ( <i>NCOR1</i> )     |             |            |               |       |            |               |       |            |                |       |
| G/G                           | 452 (35.2)  | 197 (40.1) | 1.0 (ref)     | -     | 129 (41.0) | 1.0 (ref)     | -     | 68 (38.7)  | 1.0 (ref)      | -     |
| G/A                           | 624 (48.5)  | 225 (45.7) | 0.8 (0.6-1.0) | 0.10  | 141 (44.6) | 0.7 (0.6-1.0) | 0.10  | 84 (47.6)  | 0.8 (0.6-1.2)  | 0.53  |
| A/A                           | 209 (16.3)  | 70 (14.2)  | 0.7 (0.5-1.0) | 0.12  | 46 (14.4)  | 0.7 (0.5-1.1) | 0.18  | 24 (13.7)  | 0.7 (0.4-1.2)  | 0.32  |
| G/A+A/A                       | 833 (64.8)  | 295 (59.9) | 0.8 (0.6-1.0) | 0.06  | 187 (59.1) | 0.7 (0.6-1.0) | 0.07  | 108 (61.3) | 0.8 (0.6-1.1)  | 0.39  |
| Allele G                      | 1528 (59.5) | 619 (63)   | 1.0 (ref)     | -     | 399 (63.3) | 1.0 (ref)     | -     | 220 (62.5) | 1.0 (ref)      | -     |
| Allele A                      | 1042 (40.5) | 365 (37)   | 0.8 (0.7-1.0) | 0.06  | 233 (36.7) | 0.8 (0.7-1.0) | 0.09  | 132 (37.5) | 0.8 (0.6-1.1)  | 0.31  |
| rs3759173 ( <i>TBX3</i> )     |             |            |               |       |            |               |       |            |                |       |
| C/C                           | 1077 (83.8) | 409 (83.1) | 1.0 (ref)     | -     | 261 (82.5) | 1.0 (ref)     | -     | 148 (84.1) | 1.0 (ref)      | -     |
| C/A                           | 199 (15.5)  | 81 (16.5)  | 1.0 [0.8-1.4] | 0.61  | 53 (16.9)  | 1.1 [0.7-1.5] | 0.54  | 28 (15.9)  | 1.0 [0.6-1.5]  | 0.91  |
| A/A                           | 9 (0.7)     | 2 (0.4)    | 0.5 [0.1-2.7] | 0.73  | 2 (0.6)    | 0.9 [0.1-4.2] | 1.00  | 0 (0.0)    | 0.3 [0.02-6.5] | 0.61  |
| C/A+A/A                       | 208 (16.2)  | 83 (16.9)  | 1.0 [0.7-1.3] | 0.72  | 55 (17.5)  | 1.0 [0.7-1.5] | 0.61  | 28 (15.9)  | 0.9 [0.6-1.5]  | 1.00  |
| Allele C                      | 2353 (91.6) | 899 (91.4) | 1.0 (ref)     | -     | 575 (91.0) | 1.0 (ref)     | -     | 324 (92.0) | 1.0 (ref)      | -     |
| Allele A                      | 217 (8.4)   | 85 (8.6)   | 1.0 [0.7-1.3] | 0.88  | 57 (8.0)   | 1.0 [0.7-1.4] | 0.67  | 28 (8.0)   | 0.9 [0.6-1.4]  | 0.82  |

BC breast cancer, OC ovarian cancer, OR odds ratio, CI confidence interval; <sup>a</sup> Fisher's exact test; Bold values are statistically significant (p<0.05).
